# Supplementary material for: Acetyl-bufalin shows potent efficacy against non-small-cell lung cancer by targeting the CDK9/STAT3 signalling pathway
Source: PubMed Central journal article supplement (PMC7851395; doi:10.1038/s41416-020-01135-6), 2020-10-30
Supplement: 41416_2020_1135_MOESM1_ESM.pdf [file 41416_2020_1135_MOESM1_ESM.pdf]

Figure S1

A

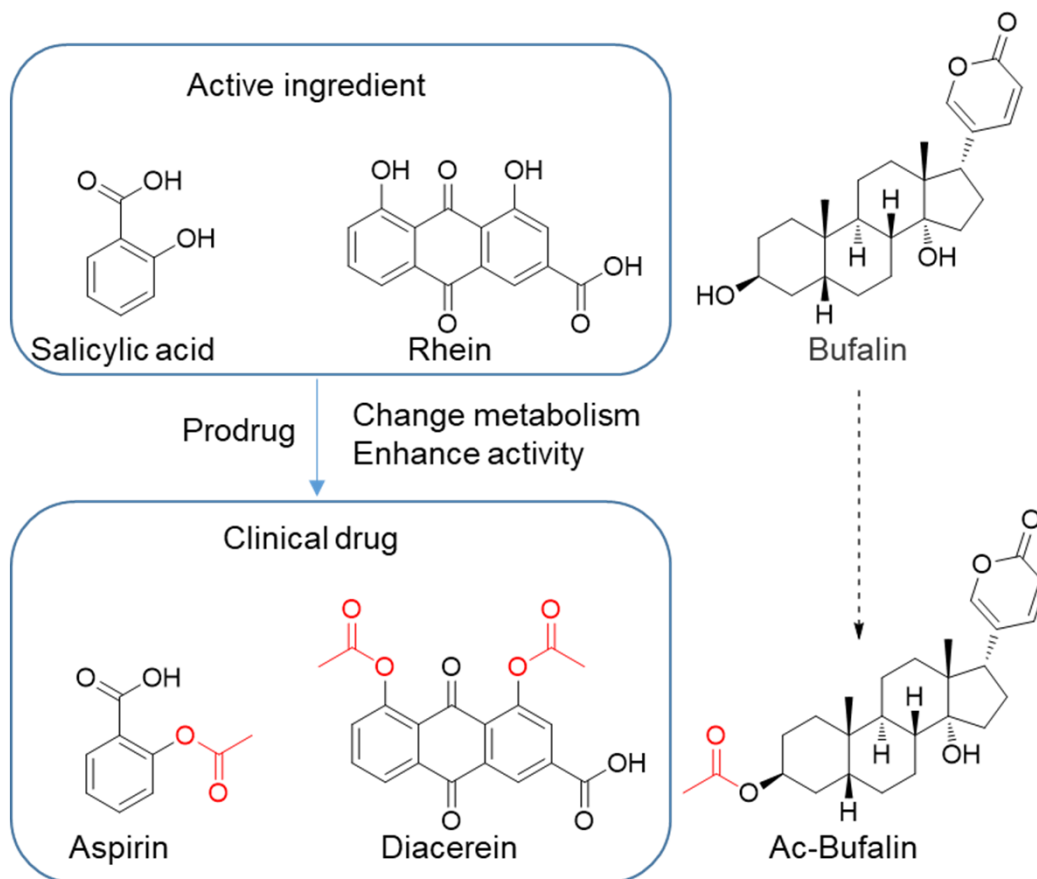

B

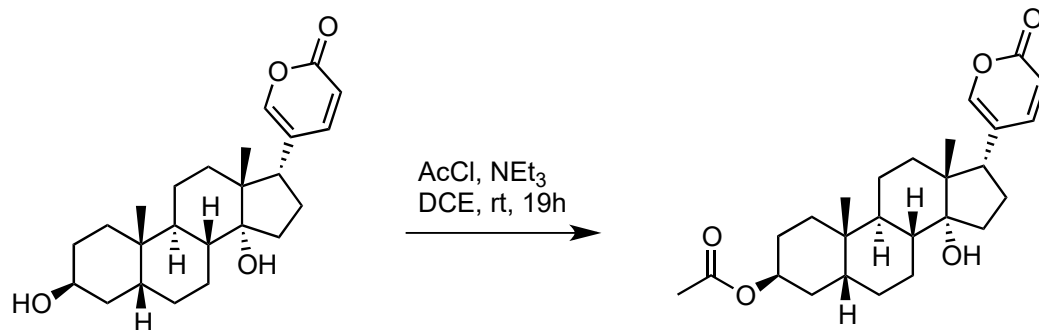

Figure S2

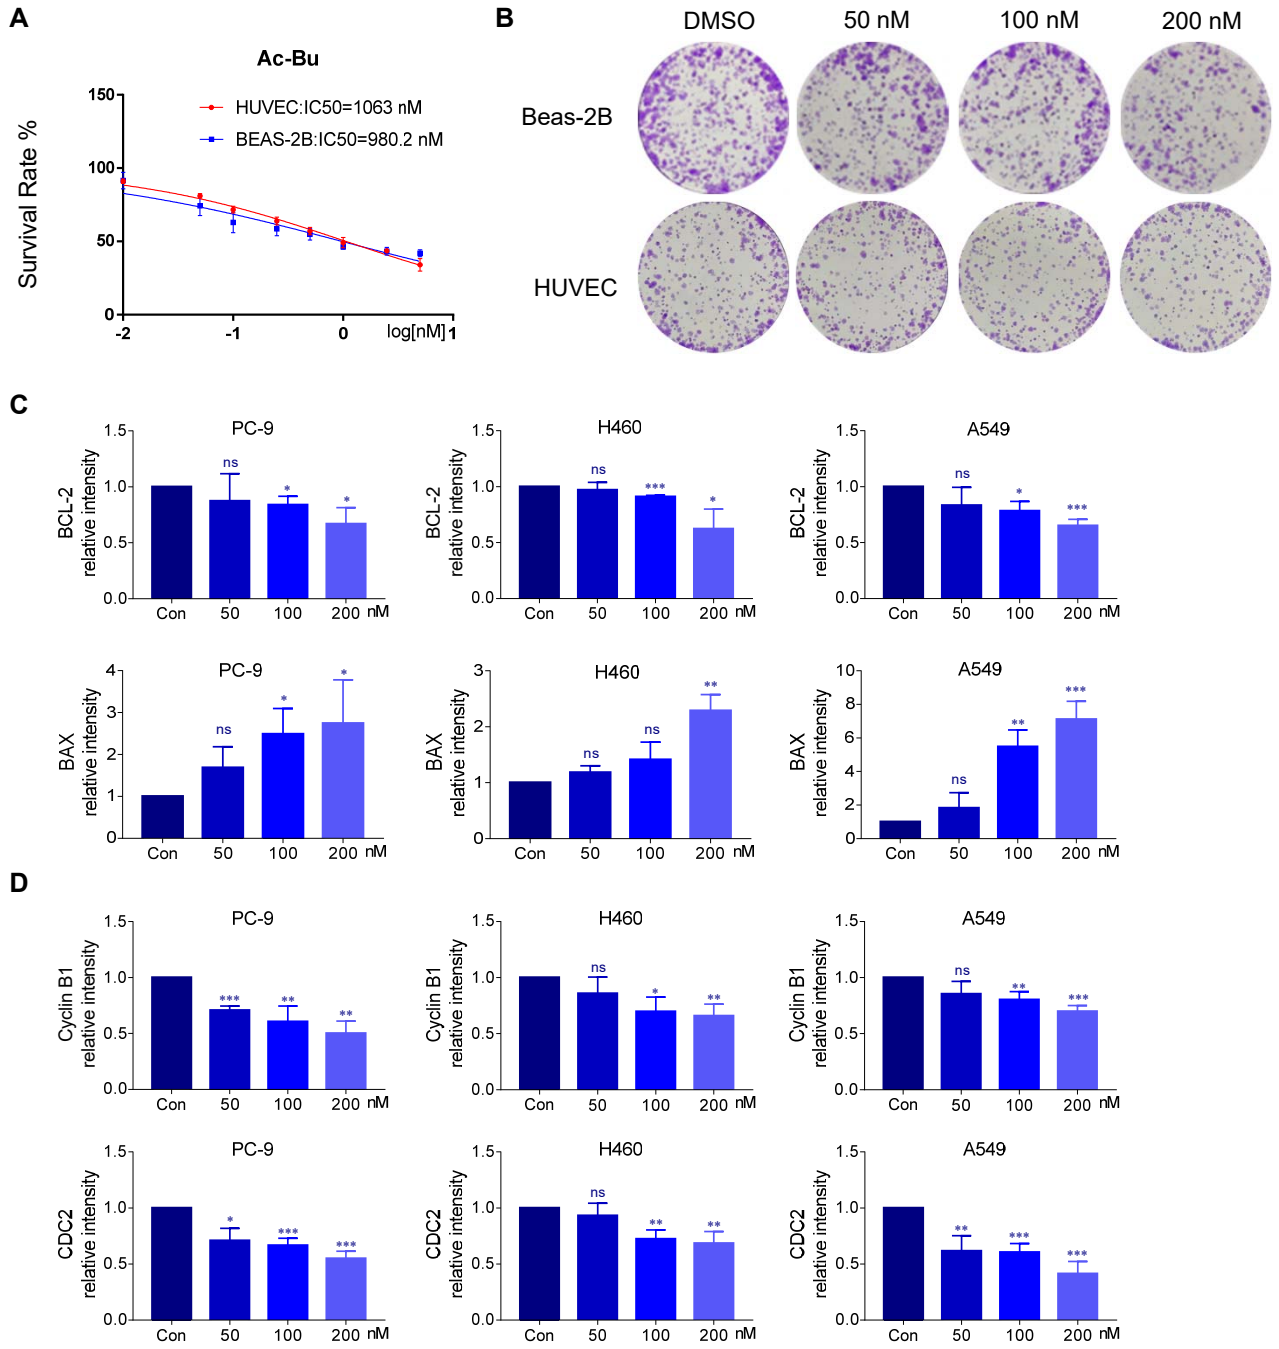

**Figure S3**

**A**

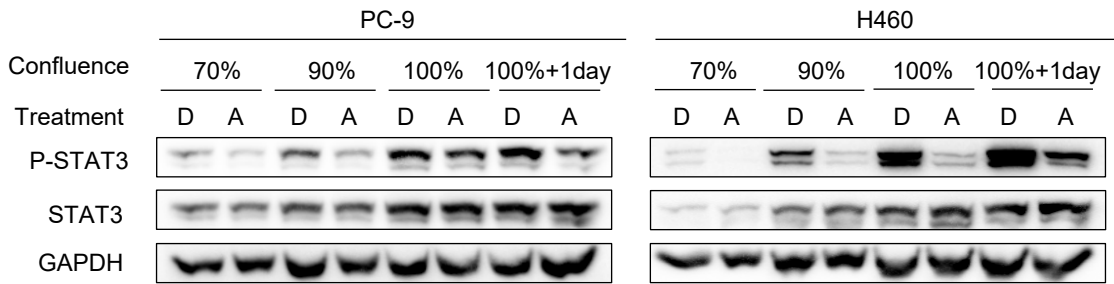

**B**

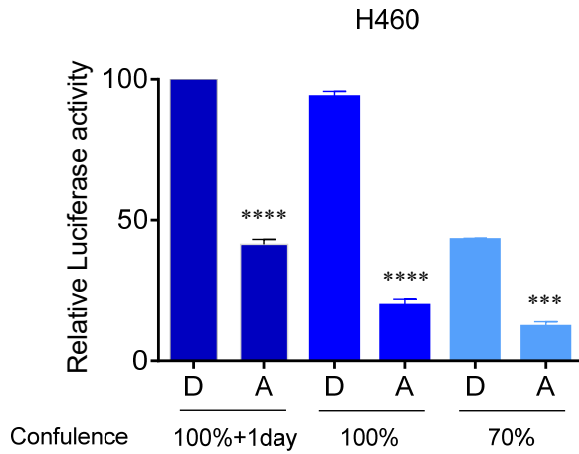

**C**

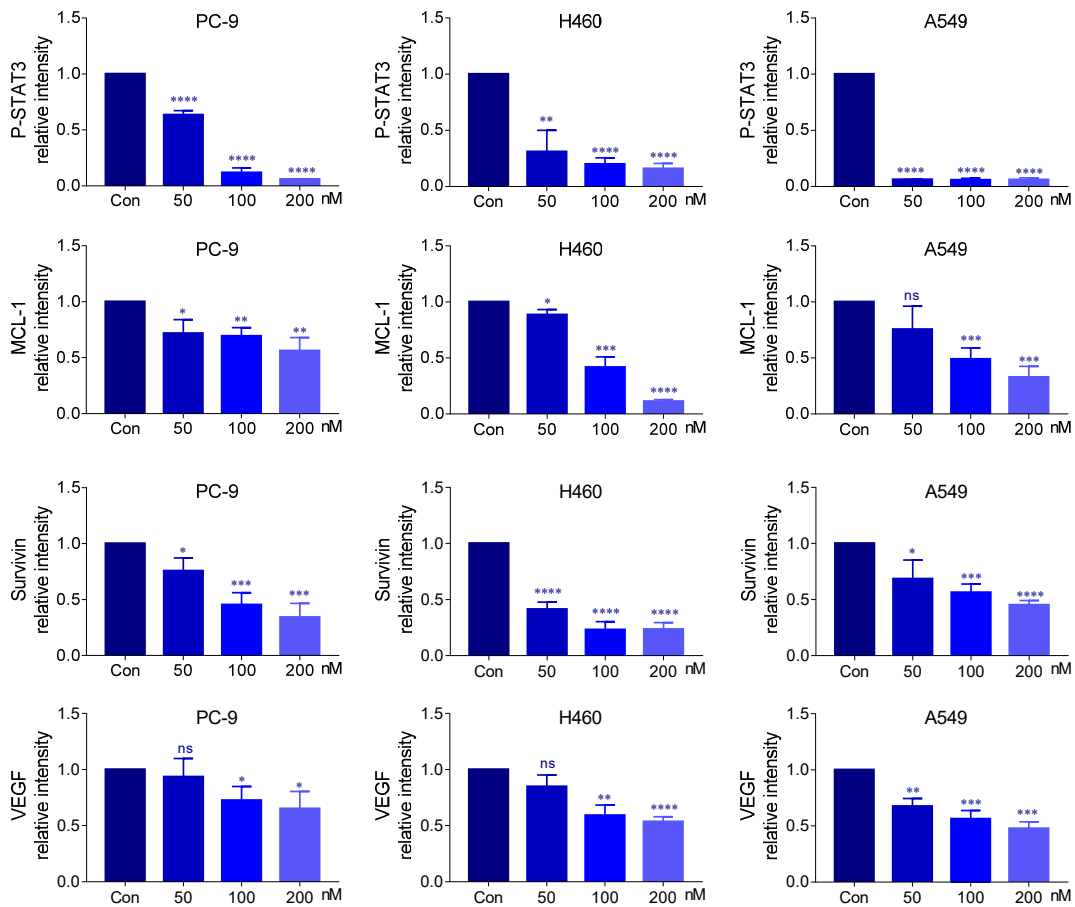

Figure S4

A

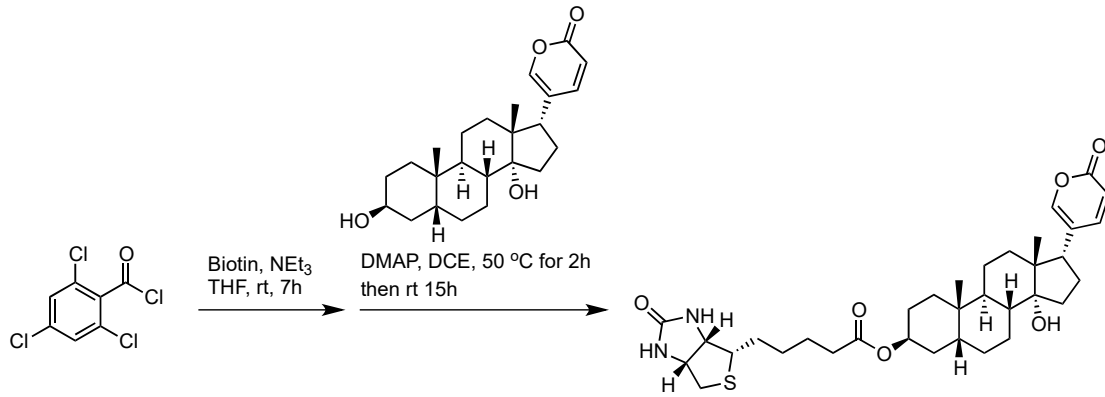

B

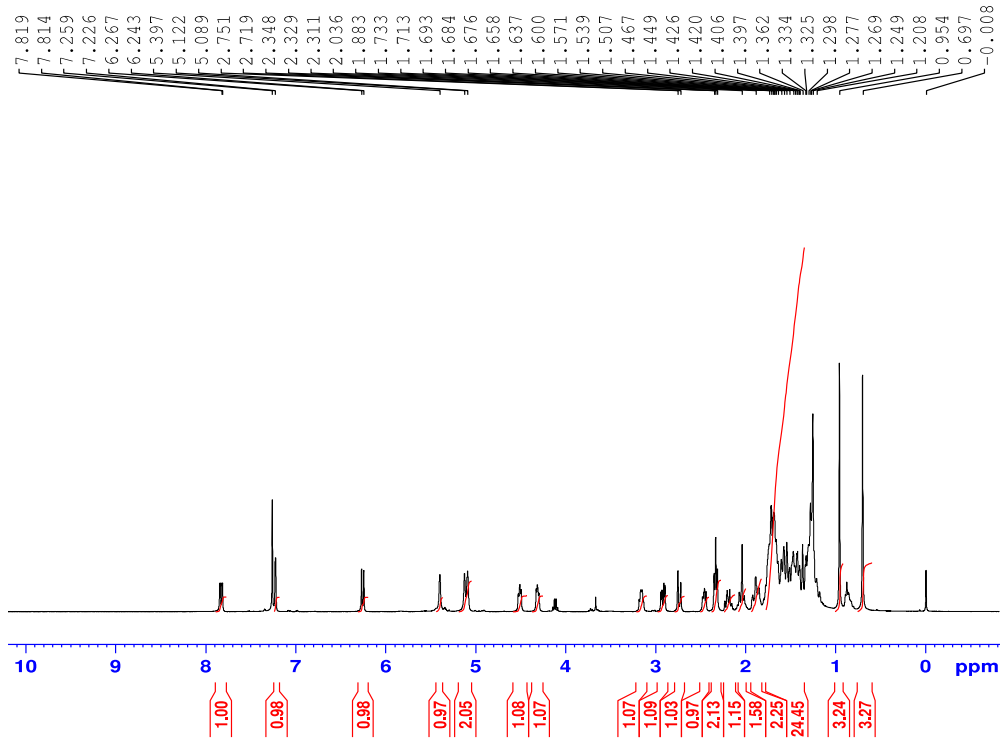

C

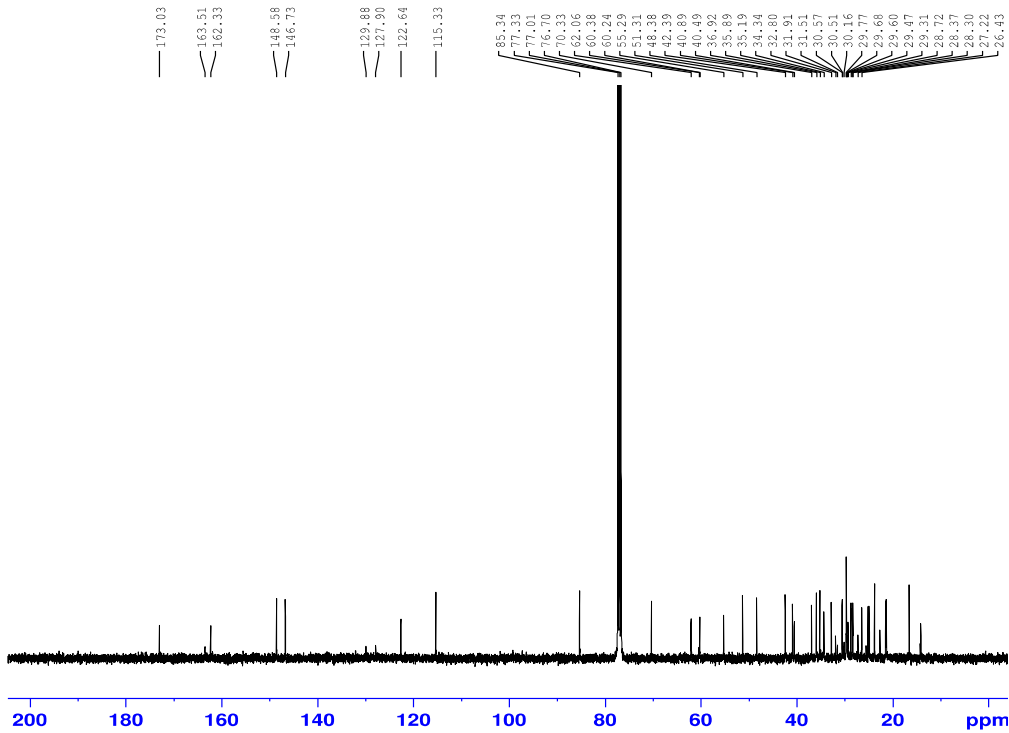

Figure S5

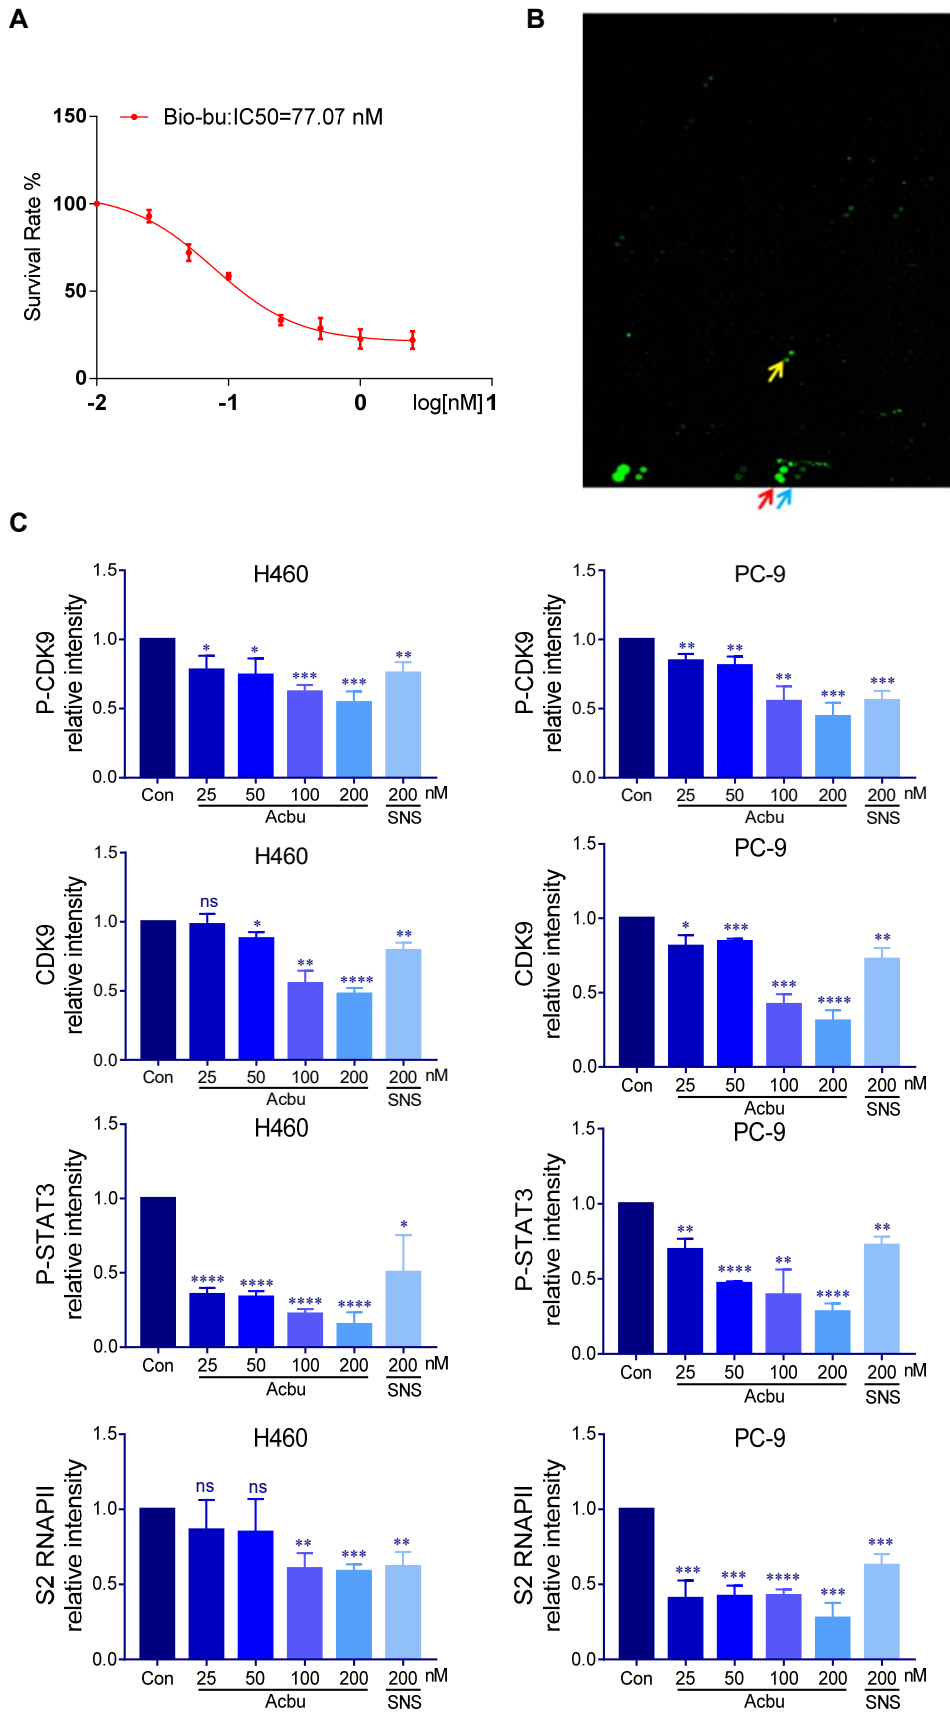

Figure S6

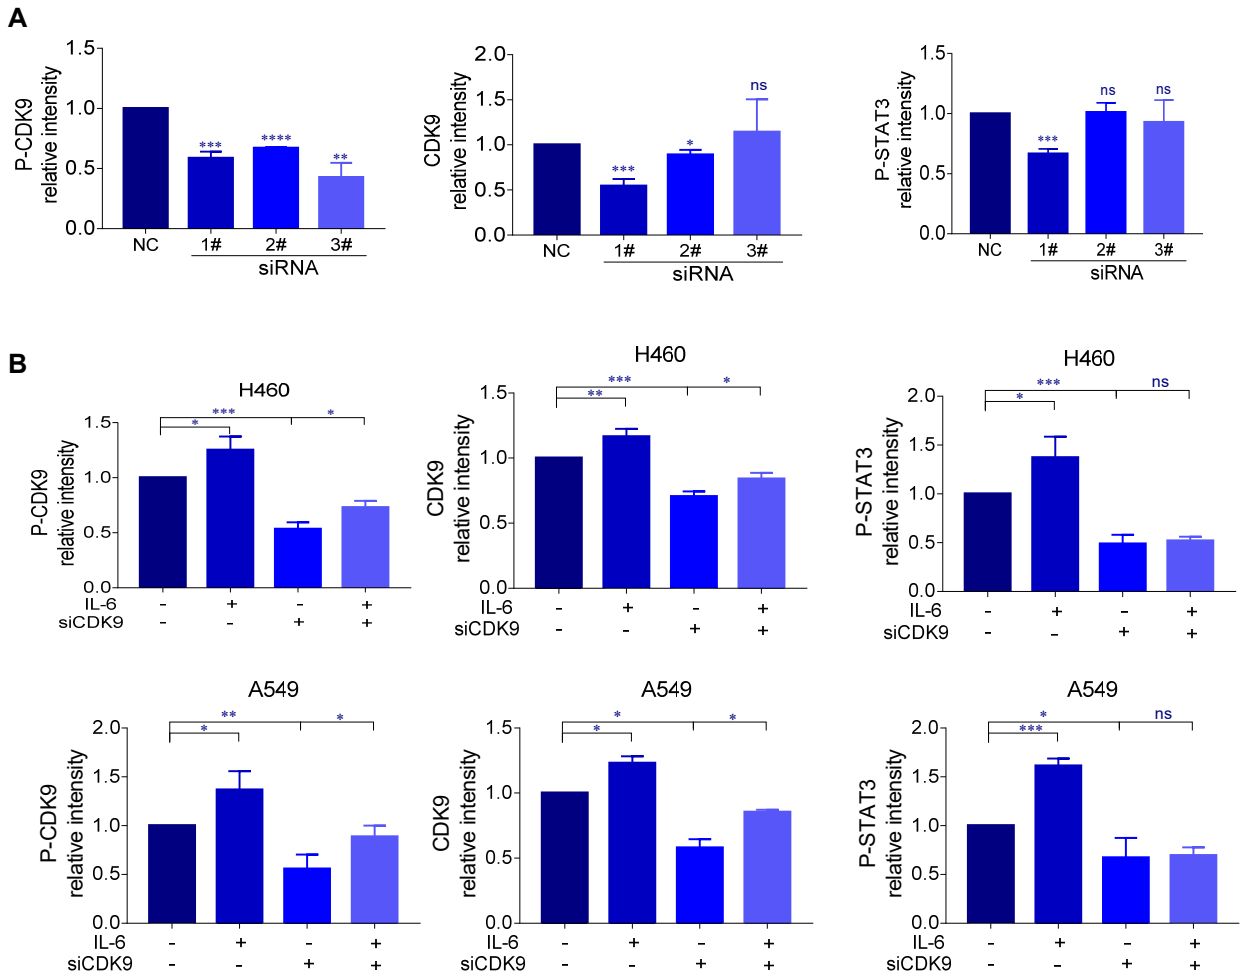

**Figure S7**

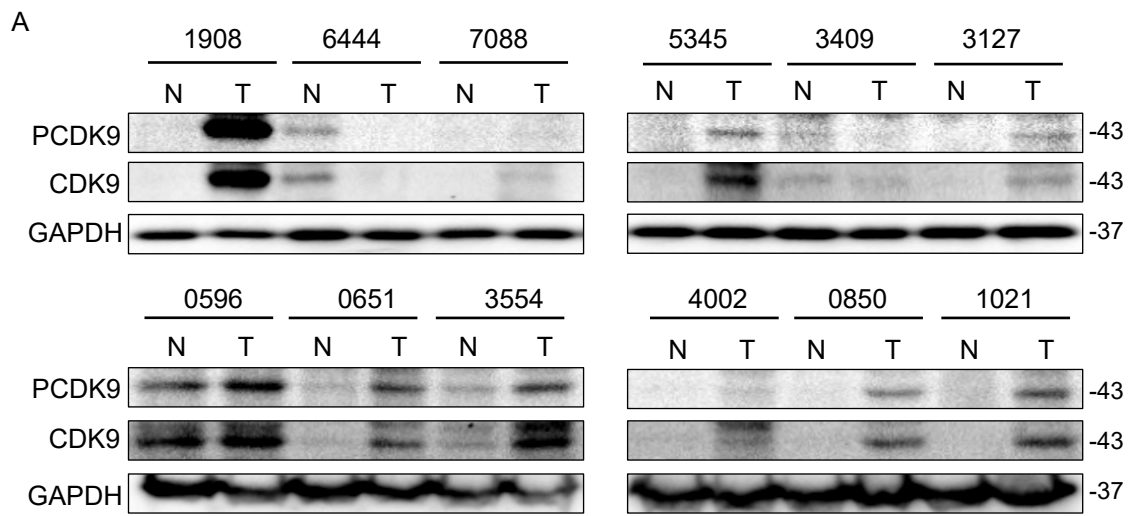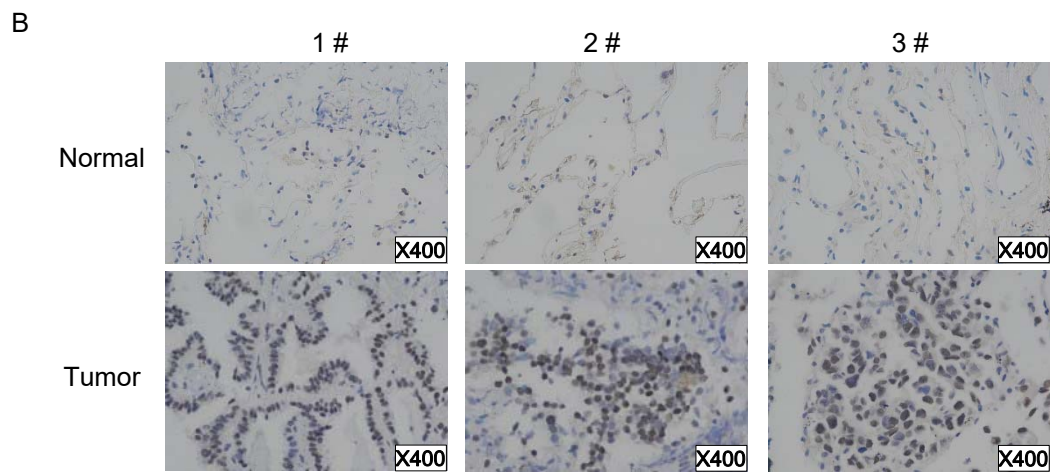

1 **Fig. S1 Designed and synthesized acetyl-bufalin**

2 **A.** Designed and synthesized acetyl-bufalin (Ac-bufalin) base on aspirin (acetylsalicylic acid) and  
3 diacerein (diacetoxy-rhein). **B.** Chemistry experimental section of Ac-bufalin: To a mixture of  
4 bufalin (15 mg, 0.0388 mmol) and NEt<sub>3</sub> (0.39 mmol) in DCE (dry, 1 mL) was added AcCl (0.39  
5 mmol), the reaction mixture was stirred at rt for 19 h. The mixture was then purified by a silica gel  
6 flash chromatography (DCM/MeOH = 50:1 to 20:1) to afford target compound (17 mg, 100% yield)  
7 as a pale yellow solid. <sup>1</sup>H NMR (400 MHz, CDCl<sub>3</sub>) δ 7.82 (dd, *J* = 9.6, 4.0 Hz, 1H), 7.22 (s, 1H),  
8 6.26 (d, *J* = 9.6 Hz, 1H), 5.07 (s, 1H), 2.49-2.40 (m, 1H), 2.26-2.15 (m, 1H), 2.09-1.99 (m, 4H),  
9 1.94-1.81 (m, 2H), 1.80-1.35 (m, 18H), 1.27 (s, 3H), 0.69 (s, 3H); <sup>13</sup>C NMR (100 MHz, CDCl<sub>3</sub>) δ  
10 170.7, 162.3, 148.6, 146.7, 122.6, 115.3, 85.4, 70.4, 51.3, 48.4, 42.4, 40.9, 36.8, 35.9, 35.2, 32.8,  
11 30.5, 30.5, 28.7, 26.4, 25.1, 23.7, 21.5, 21.4, 21.3, 16.5; ESI-HRMS: calcd. for C<sub>26</sub>H<sub>37</sub>O<sub>5</sub><sup>+</sup> (M+H)<sup>+</sup>  
12 429.2636, found 429.2637.

13

14 **Fig. S2 Antitumor activity of acetyl-bufalin *in vitro***

15 **A.** HUVEC and BEAS-2B cells were incubated with increasing doses of acetyl-bufalin for 48 h.  
16 Cell viability was determined by the MTT assay. **B.** HUVEC and BEAS-2B cells were incubated  
17 with acetyl-bufalin for 24 h and allowed to form colonies for one week. Colonies were then fixed,  
18 stained with crystal violet and photographed. **C.** Cells were treated with acetyl-bufalin at different  
19 concentrations as indicated for 24 h, the cell lysates were processed for Western blot analysis for  
20 protein expression of BCL-2 and BAX, and the relative intensity was calculated. **D.** Western blot  
21 analysis was used to detect the levels of cyclin B1 and CDC2 after acetyl-bufalin treatment and the  
22 relative intensity was calculated. \*P<0.05, \*\*P<0.01, \*\*\*P<0.001.

23

24 **Fig. S3 Acetyl-bufalin inhibited the STAT3 signaling pathway in human NSCLC cells**

25 **A.** PC-9 and H460 cells were grown to 70, 90 or 100% confluence and up to 1 day postconfluence  
26 as indicated, in the presence of 50 nM acetyl-bufalin or the DMSO diluent. Cell lysates were used  
27 to detect P-STAT3, STAT3 and GAPDH as a control. **B.** H460 cells were grown to 70, or 100%  
28 confluence and up to 1 day postconfluence, then transfected with luciferase reporter gene plasmid  
29 and treated with 50 nM acetyl-bufalin or the DMSO diluent. The results were normalized to the



30 Renilla luciferase activity. **C.** H460, A549 and PC-9 cells treated with concentration gradients of  
31 acetyl-bufalin. STAT3 and its downstream target genes, including MCL-1, Survivin and VEGF,  
32 were detected via western blot analysis. The relative intensity was calculated. \*P<0.05, \*\*P<0.01,  
33 \*\*\*P<0.001, \*\*\*\*P<0.0001.

34

#### 35 **Fig.S4 Chemistry experimental section of Bio-bufalin**

36 To a mixture of Biotin (0.3 mmol) and NEt<sub>3</sub> (0.45 mmol) in THF (dry, 3 mL) was added 2,4,6-  
37 trichlorobenzoyl chloride (0.3 mmol), the reaction mixture was stirred at rt for 7 h. The bufalin (20  
38 mg, 0.052 mmol), DMAP (0.4 mmol) and DCE (dry, 4 mL) were added. The suspension was stirred  
39 at 100 °C for 2 h and then rt for 15 h. The mixture was then washed with 1 N HCl (aq, x 3) and  
40 brine, purified by a silica gel flash chromatography (DCM/MeOH = 30:1 to 10:1) to afford target  
41 compound (18.0 mg, 57% yield) as a white solid.

42 <sup>1</sup>H NMR (400 MHz, CDCl<sub>3</sub>) δ 7.83 (dd, *J* = 9.6, 4.0 Hz, 1H), 7.23 (s, 1H), 6.26 (d, *J* = 9.6 Hz, 1H),  
43 5.40 (s, 1H), 5.12 (s, 1H), 5.09 (s, 1H), 4.52-4.49 (m, 1H), 4.33-4.30 (m, 1H), 3.16-3.15 (m, 1H),  
44 2.92 (dd, *J* = 12.8, 4.8 Hz, 1H), 2.74 (d, *J* = 12.8 Hz, 1H), 2.45-2.44 (m, 1H), 2.33 (t, *J* = 7.6 Hz,  
45 2H), 2.20-2.17 (m, 1H), 2.09-1.94 (m, 1H), 1.96-1.81 (m, 2H), 1.80-1.35 (m, 24H), 1.21 (s, 3H),  
46 0.70 (s, 3H); <sup>13</sup>C NMR (100 MHz, CDCl<sub>3</sub>) δ 173.0, 163.5, 162.3, 148.6, 146.7, 122.6, 115.3, 85.3,  
47 70.3, 62.1, 60.2, 55.3, 51.3, 48.4, 42.4, 40.9, 40.5, 36.9, 35.9, 35.2, 34.3, 32.8, 30.6, 30.5, 29.7, 29.5,  
48 28.7, 26.4, 25.5, 25.1, 23.8, 21.4, 21.3, 16.5; ESI-HRMS: calcd. for C<sub>34</sub>H<sub>49</sub>N<sub>2</sub>O<sub>6</sub>S<sup>+</sup> (M+H)<sup>+</sup>  
49 613.3306, found 613.3307.

50

#### 51 **Fig.S5 CDK9 is a direct target of acetyl-bufalin**

52 **A.** Viability of PC-9 cells exposed to biotin-labeled bufalin as determined by MTT assay. **B.**  
53 Representative image of an experimental microarray (blue = negative control, red = positive control,  
54 yellow= positive spot). **C.** The expression of proteins involved in the CDK9/STAT3 pathway in  
55 H460 and PC-9 cells was examined by Western blotting after acetyl-bufalin (Ac-bu) and SNS-032  
56 (SNS) treatment, and the relative intensity was calculated. \*p < 0.05, \*\*p < 0.01, \*\*\*p < 0.00,  
57 \*\*\*\*P<0.0001.

58

59 **Fig.S6 Acetyl-bufalin inhibited the CDK9/STAT3 signaling pathway**

60 **A.** CDK9 and STAT3 expression levels by western blotting after transduction with CDK9 siRNA  
61 in H460 cells, the relative intensity was calculated. **B.** Western blot analysis of CDK9 and STAT3  
62 expression levels in H460 and PC-9 cells transfected with CDK9 siRNA1 and treated for 30 min  
63 with or without IL-6 (25 ng/ml). The relative intensity was calculated. \*p < 0.05, \*\*p < 0.01, \*\*\*p  
64 <0.001, \*\*\*\*p<0.0001.

65

66 **Fig.S7 High CDK9 expression in human NSCLC tissues**

67 **A.** Protein expression of CDK9 in each paired human NSCLC tissue sample (T) and adjacent normal  
68 lung tissues (N) from the same patient was detected by western blotting. **B.** Immunohistochemical  
69 analysis for P-CDK9 from human NSCLC tissue samples and normal tissue samples.

70

71 **Supplementary Table 1:** IC50 of the main active components of cinobufagin in different NSCLC  
72 cells.

73 **Supplementary Table 2:** The clinicopathologic characteristics of samples

74

**Supplementary Table 1**

| <b>Drug</b>            | <b>IC<sub>50</sub> <math>\mu</math>M</b> |             |             |
|------------------------|------------------------------------------|-------------|-------------|
|                        | <b>PC-9</b>                              | <b>A549</b> | <b>H460</b> |
| Arenobufagin           | 0.46                                     | 0.01274     |             |
| Bufalin                | 0.1409                                   | 0.08323     | 0.06472     |
| Bufotalin              | 0.8133                                   |             |             |
| Pseudobufarenogin      | > 100                                    | 4.268       |             |
| Cinobufagin            | 0.4144                                   |             |             |
| Cinobufotalin          | 0.5868                                   | 0.8186      |             |
| Desacetylcinobufagin   | 10.06                                    | 1.818       |             |
| Desacetylcinobufotalin | 2.888                                    | 0.8867      |             |
| Gamabufotalin          | 0.281                                    | 0.7302      |             |
| Resibufogenin          | 4.64                                     | 1.129       | 1.061       |
| Telocinobufagin        | 0.5741                                   | 0.1457      |             |
| Marinobufagin          | 15.00                                    | 1.547       | 1.301       |
| Resibufagin            | 16.02                                    |             |             |

**Supplementary Table 2****The clinicopathologic characteristics of samples**

| <b>Number</b> | <b>Age</b> | <b>Sex</b> | <b>Pathological diagnosis</b> | <b>TNM</b> |
|---------------|------------|------------|-------------------------------|------------|
| 1             | 63         | Male       | Adenocarcinoma                | T1bN0M0    |
| 2             | 59         | Male       | Squamous cell carcinoma       | T3N0M0     |
| 3             | 52         | Female     | Adenocarcinoma                | T1bN0MX    |
| 4             | 64         | Female     | Adenocarcinoma                | T1cN1MX    |
| 5             | 71         | Male       | Adenocarcinoma                | T2aN2M0    |
| 6             | 67         | Female     | Adenocarcinoma                | T1bN0MX    |
| 7             | 74         | Female     | Squamous cell carcinoma       | T4NXM0     |
| 8             | 66         | Female     | Adenocarcinoma                | T1bN0M0    |
| 9             | 79         | Female     | Adenocarcinoma                | T1cN0M0    |
| 10            | 68         | Male       | Adenocarcinoma                | T1bN0M0    |
| 11            | 60         | Male       | Adenocarcinoma                | T1bN0MX    |
| 12            | 54         | Male       | Adenocarcinoma                | T1bN0M0    |
